# Supplementary material for: Does primary neoadjuvant systemic therapy eradicate minimal residual disease? Analysis of disseminated and circulating tumor cells before and after therapy
Source: PubMed Central journal article supplement (PMC4751719; doi:10.1186/s13058-016-0679-3), 2016-02-12
Supplement: 13058_2016_679_MOESM1_ESM.pdf [file 13058_2016_679_MOESM1_ESM.pdf]

|                       |     |  |  |
|-----------------------|-----|--|--|
| included in the study | 190 |  |  |
|-----------------------|-----|--|--|

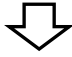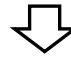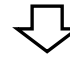

|                   | CTC |   |   |   |
|-------------------|-----|---|---|---|
| Exist before NATC | y   | y | n | n |
| Exist after NATC  | y   | n | y | n |

|                   | DTC |   |   |   |
|-------------------|-----|---|---|---|
| Exist before NATC | y   | y | n | n |
| Exist after NATC  | y   | n | y | n |

|                   | OR (CTC, DTC) |   |   |   |
|-------------------|---------------|---|---|---|
| Exist before NATC | y             | y | n | n |
| Exist after NATC  | y             | n | y | n |

|    |    |   |    |
|----|----|---|----|
| 92 | 43 | 1 | 14 |
|----|----|---|----|

|     |    |    |   |
|-----|----|----|---|
| 118 | 27 | 47 | 1 |
|-----|----|----|---|

|    |    |    |    |
|----|----|----|----|
| 97 | 39 | 43 | 11 |
|----|----|----|----|

y = yes / done  
n = no / not done

\_\_\_\_\_

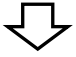

| sSICTC |   |   |   |
|--------|---|---|---|
| y      | y | n | n |
| y      | n | y | n |

|    |    |    |    |
|----|----|----|----|
| 48 | 42 | 43 | 57 |
|----|----|----|----|
